# Supplementary material for: Analysis of MDM2 and MDM4 Single Nucleotide Polymorphisms, mRNA Splicing and Protein Expression in Retinoblastoma
Source: PubMed Central journal article supplement (PMC3423419; doi:10.1371/journal.pone.0042739), 2012-08-20
Supplement: pone.0042739.s004.pdf [file pone.0042739.s004.pdf]

**Supplemental Table 3. MDM2 expression levels for each MDM2 SNP309 genotype.**

| Genotype | # of samples | 205385_at               |           | 205386_s_at             |           | 211832_s_at             |           | 217542_at               |           | 229711_s_at             |           | 237891_at               |           |
|----------|--------------|-------------------------|-----------|-------------------------|-----------|-------------------------|-----------|-------------------------|-----------|-------------------------|-----------|-------------------------|-----------|
|          |              | Mean                    | Std. Dev. | Mean                    | Std. Dev. | Mean                    | Std. Dev. | Mean                    | Std. Dev. | Mean                    | Std. Dev. | Mean                    | Std. Dev. |
| T/T      | 13           | 5.95                    | 0.6       | 6.46                    | 0.54      | 4.96                    | 0.52      | 8.08                    | 0.86      | 10.68                   | 0.68      | 5.11                    | 0.59      |
| T/G      | 5            | 6.3                     | 0.63      | 6.6                     | 0.52      | 4.73                    | 0.28      | 8.95                    | 0.7       | 10.73                   | 0.36      | 5.39                    | 0.56      |
| G/G      | 3            | 5.99                    | 0.32      | 6.39                    | 0.69      | 4.82                    | 0.05      | 8.69                    | 0.04      | 10.33                   | 1.47      | 4.85                    | 0.49      |
|          |              | <i>p value = 0.4975</i> |           | <i>p value = 0.8681</i> |           | <i>p value = 0.4629</i> |           | <i>p value = 0.0767</i> |           | <i>p value = 0.9183</i> |           | <i>p value = 0.5814</i> |           |

The *p value* reflects the statistical significance of the correlation between SNP genotypes and gene expression.
