# Supplementary material for: Analysis of MDM2 and MDM4 Single Nucleotide Polymorphisms, mRNA Splicing and Protein Expression in Retinoblastoma
Source: PubMed Central journal article supplement (PMC3423419; doi:10.1371/journal.pone.0042739), 2012-08-20
Supplement: pone.0042739.s005.pdf [file pone.0042739.s005.pdf]

**Supplemental Table 4. MDM4 expression levels for each MDM4 SNP7 genotype.**

| Genotype | # of samples | <i>205655_at</i>       |           | <i>236814_at</i>        |           | <i>235589_at</i>        |           | <i>235162_at</i>        |           | <i>225742_at</i>        |           |
|----------|--------------|------------------------|-----------|-------------------------|-----------|-------------------------|-----------|-------------------------|-----------|-------------------------|-----------|
|          |              | Mean                   | Std. Dev. | Mean                    | Std. Dev. | Mean                    | Std. Dev. | Mean                    | Std. Dev. | Mean                    | Std. Dev. |
| C/C      | 14           | 6.746813               | 0.65009   | 11.90514                | 0.373864  | 11.04347                | 0.561138  | 9.079377                | 0.640434  | 8.9798007               | 0.49757   |
| T/C      | 5            | 7.16846                | 0.338023  | 12.0092                 | 0.38993   | 11.14278                | 0.481391  | 8.53062                 | 0.366049  | 8.8537875               | 0.534494  |
| T/T      | 3            | 7.091993               | 0.336163  | 11.75437                | 0.966777  | 11.09357                | 0.714262  | 9.23664                 | 0.290161  | 9.4168267               | 0.62526   |
|          |              | <i>p value = 0.663</i> |           | <i>p value = 0.2952</i> |           | <i>p value = 0.4833</i> |           | <i>p value = 0.0668</i> |           | <i>p value = 0.1925</i> |           |

The *p value* reflects the statistical significance of the correlation between SNP genotypes and gene expression.
