# Supplementary material for: Analysis of MDM2 and MDM4 Single Nucleotide Polymorphisms, mRNA Splicing and Protein Expression in Retinoblastoma
Source: PubMed Central journal article supplement (PMC3423419; doi:10.1371/journal.pone.0042739), 2012-08-20
Supplement: pone.0042739.s006.pdf [file pone.0042739.s006.pdf]

**Supplemental Table 5. MDM4 SNP34091 genotype in retinoblastoma**

| Sample    | MDM4 SNP34091 |          | Copy number |
|-----------|---------------|----------|-------------|
|           | Tumor         | Germline |             |
| SJ05      | C/C           | C/C      | 1           |
| SJ06      | A/A           | A/A      | 0           |
| SJ07**    | C/A           | C/A      | 0           |
| SJ12**    | A/A*          | C/A*     | 0           |
| SJ14      | A/A           | A/A      | 1           |
| SJ16      | C/A           | C/A      | 1           |
| SJ17      | A/A           | A/A      | 1           |
| SJ18      | A/A           | A/A      | 1           |
| SJ26      | A/A           | A/A      | 0           |
| SJ28      | A/A           | A/A      | 0           |
| SJ29      | A/A           | A/A      | 0           |
| SJ30      | A/A*          | C/A*     | 1           |
| SJ31      | A/A           | A/A      | 1           |
| SJ32      | C/C*          | A/A*     | 1           |
| SJ33      | N/A           | A/A      | 0           |
| SJ34      | A/A           | A/A      | 1           |
| SJ35**    | C/A           | C/A      | 0           |
| SJ36      | A/A           | A/A      | 0           |
| SJ37**    | C/A           | C/A      | 1           |
| SJ38**    | A/A           | A/A      | 1           |
| SJ39      | A/A           | A/A      | 0           |
| SJ39-X    | A/A           | A/A      | 0           |
| SJ40      | A/A           | A/A      | 0           |
| SJ41**    | A/A           | A/A      | 0           |
| SJ41-X**  | A/A           | A/A      | 0           |
| SJ42      | A/A           | A/A      | 1           |
| SJ42-X    | A/A           | A/A      | 1           |
| SJ43      | A/A           | A/A      | 1           |
| SJ44      | C/A           | C/A      | 1           |
| SJ45**    | A/A           | A/A      | 1           |
| SJ46      | C/A           | C/A      | 1           |
| SJ49      | A/A           | A/A      | 1           |
| SJ50      | C/A           | C/A      | 0           |
| SJRB005   | A/A           | A/A      | 1           |
| SJRB012   | A/A           | A/A      | 1           |
| SJRB014   | C/A           | C/A      | 1           |
| SJRB015   | C/C           | C/C      | 0           |
| SJRB016   | A/A           | A/A      | 0           |
| SJRB028   | C/C*          | A/A*     | 0           |
| SJRB029** | C/C           | C/C      | 1           |
| SJRB030** | A/A           | A/A      | 0           |
| SJRB031   | A/A           | A/A      | 0           |
| SJRB032   | A/A           | A/A      | 1           |
| SJRB033** | A/A           | A/A      | 1           |
| SJRB038** | A/A           | A/A      | 0           |
| SJRB047** | A/A           | A/A      | 0           |
| SJRB048   | A/A           | A/A      | 1           |

X indicates orthotopic xenograft sample

N/A indicates sequence is not available for this sample.

"1" indicates a gain in one copy of the MDM4 locus changing the total copy number to 3.

"0" indicates no change in the diploid state for the MDM4 locus.

\* Discordant genotype

\*\* Rb1 germline mutation
