# Supplementary material for: Analysis of MDM2 and MDM4 Single Nucleotide Polymorphisms, mRNA Splicing and Protein Expression in Retinoblastoma
Source: PubMed Central journal article supplement (PMC3423419; doi:10.1371/journal.pone.0042739), 2012-08-20
Supplement: pone.0042739.s007.pdf [file pone.0042739.s007.pdf]

**Supplemental Table 6. MDM4 expression levels for each MDM4 SNP34091 genotype.**

| Genotype | # of samples | <i>205655_at</i>   |           | <i>225742_at</i>        |           | <i>235162_at</i>       |           | <i>236814_at</i>        |           | <i>235589_s_at</i>      |           |
|----------|--------------|--------------------|-----------|-------------------------|-----------|------------------------|-----------|-------------------------|-----------|-------------------------|-----------|
|          |              | Mean               | Std. Dev. | Mean                    | Std. Dev. | Mean                   | Std. Dev. | Mean                    | Std. Dev. | Mean                    | Std. Dev. |
| A/A      | 17           | 6.82               | 0.62      | 8.98                    | 0.47      | 9.03                   | 0.62      | 11.91                   | 0.50      | 11.05                   | 0.56      |
| C/A      | 4            | 6.91               | 0.63      | 8.96                    | 0.54      | 8.69                   | 0.39      | 11.83                   | 0.20      | 10.93                   | 0.36      |
|          |              | <i>p value = 1</i> |           | <i>p value = 0.9654</i> |           | <i>p value = 0.275</i> |           | <i>p value = 0.4104</i> |           | <i>p value = 0.6977</i> |           |

The *p value* reflects the statistical significance of the correlation between SNP genotypes and gene expression.
