# Supplementary material for: Analysis of MDM2 and MDM4 Single Nucleotide Polymorphisms, mRNA Splicing and Protein Expression in Retinoblastoma
Source: PubMed Central journal article supplement (PMC3423419; doi:10.1371/journal.pone.0042739), 2012-08-20
Supplement: pone.0042739.s008.pdf [file pone.0042739.s008.pdf]

**Supplemental Table 7: SNP34091 Genotype Comparison Between Retinoblastoma Patients and HapMap Cohort**

| <b>Genotype</b> | <i>Black*</i>           |               | <i>White*</i>           |               |
|-----------------|-------------------------|---------------|-------------------------|---------------|
|                 | <b>Patients</b>         | <b>HapMap</b> | <b>Patients</b>         | <b>HapMap</b> |
| AA              | 9                       | 31            | 14                      | 36            |
| AC              | 0                       | 19            | 6                       | 15            |
| CC              | 3                       | 6             | 0                       | 3             |
|                 | <i>p value = 0.0254</i> |               | <i>p value = 0.8047</i> |               |

The Mantel-Haenzel test was used to compare genotype frequencies of RB cases to that of HapMap among both whites and blacks while stratifying for race. This test found no significant association ( $p = 0.3926$ ).

\*Subjects of other or mixed racial backgrounds were excluded due to small sample size in our retinoblastoma cohort.
