# Supplementary material for: Analysis of MDM2 and MDM4 Single Nucleotide Polymorphisms, mRNA Splicing and Protein Expression in Retinoblastoma
Source: PubMed Central journal article supplement (PMC3423419; doi:10.1371/journal.pone.0042739), 2012-08-20
Supplement: pone.0042739.s009.pdf [file pone.0042739.s009.pdf]

**Supplemental Table 8. Target genes associated with mir-191 expression in retinoblastoma tumors.**

| <b>Gene</b> | <b>Probeset</b> | <b>corr</b> | <b>p.fdr</b> |
|-------------|-----------------|-------------|--------------|
| SYT13       | 226086_at       | -0.808      | 0.00033      |
| ATP1B1      | 201242_s_at     | -0.762      | 2.27E-05     |
| ATP1B1      | 201243_s_at     | -0.756      | 2.05E-06     |
| LOC149134   | 230541_at       | -0.740      | 0.00045      |
| E2F3        | 203692_s_at     | -0.723      | 2.87E-06     |
| SLC12A2     | 204404_at       | -0.673      | 2.76E-07     |
| RABGAP1L    | 215342_s_at     | -0.669      | 2.48E-06     |
| PHLDA2      | 209803_s_at     | -0.665      | 5.63E-05     |
| CEP164      | 1558953_s_at    | -0.659      | 0.00072      |
| SLC39A14    | 212110_at       | -0.654      | 0.0007       |
| GREM2       | 220794_at       | -0.648      | 2.23E-05     |
| GNG4        | 205184_at       | -0.646      | 1.93E-05     |
| EML6        | 229656_s_at     | -0.631      | 7.69E-06     |
| AMDHD1      | 229596_at       | -0.629      | 0.00055      |
| C6orf89     | 224988_at       | -0.623      | 0.00095      |
| GREM2       | 240509_s_at     | -0.621      | 1.45E-05     |
| MYO3A       | 1569186_at      | -0.614      | 1.50E-05     |
| ABCC4       | 203196_at       | -0.614      | 2.00E-07     |
| DCP2        | 235258_at       | -0.609      | 0.00012      |
| HOXC6       | 206858_s_at     | -0.605      | 2.00E-07     |
| ABCC4       | 1554918_a_at    | -0.601      | 8.93E-05     |
| JAM2        | 219213_at       | -0.600      | 2.38E-06     |
